# Supplementary material for: Grafting Polytetrafluoroethylene Micropowder via in Situ Electron Beam Irradiation-Induced Polymerization
Source: MDPI journal article supplement (doi:10.3390/polym10050503), 2018-05-06
Supplement: s1 [file s1]

# Supplementary materials: Grafting Polytetrafluoroethylene Micropowder via in Situ Electron Beam Irradiation-Induced Polymerization

Hui Wang <sup>1</sup>, Yingfeng Wen <sup>1</sup>, Haiyan Peng <sup>1</sup>, Chengfu Zheng <sup>2</sup>, Yuesheng Li <sup>3</sup>, Sheng Wang <sup>3</sup>, Shaofa Sun <sup>3,\*</sup>, Xiaolin Xie <sup>1,2</sup> and Xingping Zhou <sup>1,\*</sup>

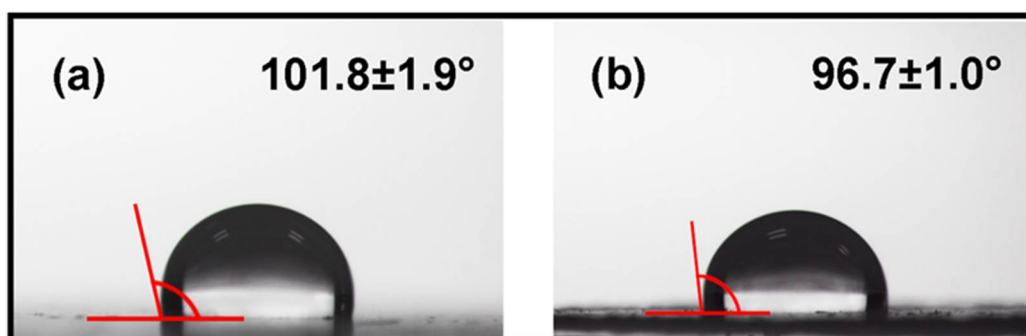

**Figure S1.** Photographs of a water droplet on the surface of (a) PTFE tablet and (b) PMMA-g-PTFE tablet with a DG of 27.9%.

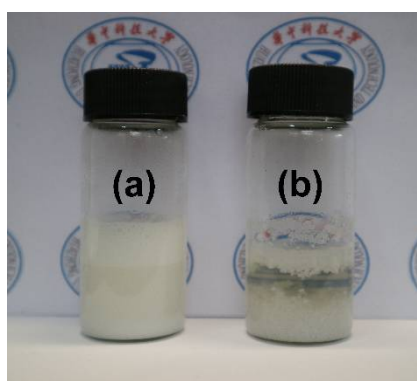

**Figure S2.** Photographs of suspensions of the pristine PTFE micropowder dispersed in MMA monomer solution (a) with 0.05 wt% fluorosurfactant and (b) without fluorosurfactant.

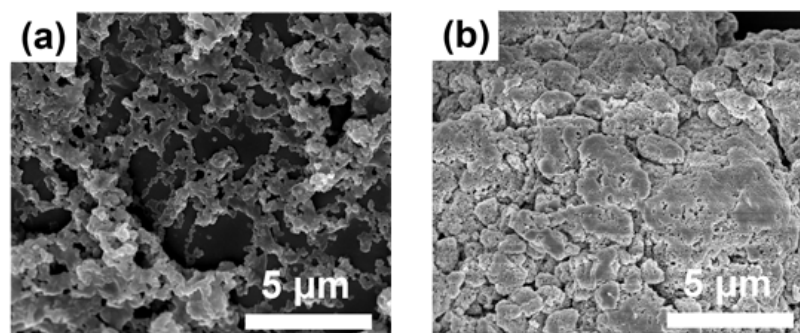

**Figure S3.** SEM images of the PMMA-g-PTFE micropowder obtained with MMA monomer solution (a) with 0.05 wt% fluorosurfactant and (b) without fluorosurfactant.

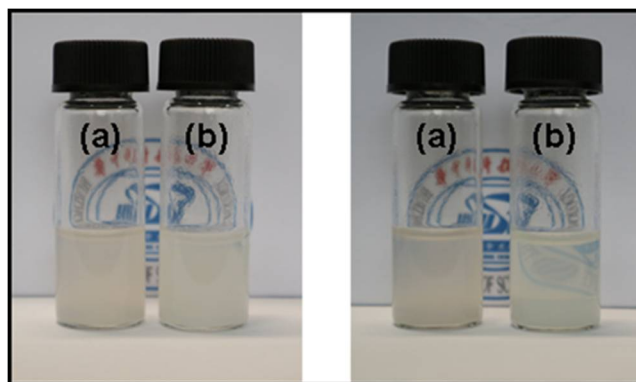

**Figure S4.** Photographs of suspensions of (a) the pristine PTFE and (b) PMMA-g-PTFE micropowder dispersed in polyacrylate solution after being stood for 2 h.
